# Supplementary material for: A Randomized, Open-Label, Multicenter, Phase 3 Study of High-Dose Vitamin C Plus FOLFOX ± Bevacizumab versus FOLFOX ± Bevacizumab in Unresectable Untreated Metastatic Colorectal Cancer (VITALITY Study)
Source: Oxford University Press journal article supplement (doi:10.1158/1078-0432.ccr-22-0655), 2022-08-05
Supplement: ccr-22-0655_supplementary_legend_ls1_suppls1.docx [file ccr-22-0655_supplementary_legend_ls1_suppls1.docx]

**Supplementary figure legends**

**Figure S****1. Forest plot for subgroup analysis**

Abbreviations: Control group, Chemotherapy only; Experimental group, Chemotherapy plus high-dose vitamin C; ECOG PS, Eastern Cooperative Oncology Group performance status

**Figure S2. Progression-free survival of patients with wild-type RAS**

Abbreviations:Control group, Chemotherapy only; Experimental group, Chemotherapy plus high-dose vitamin C

**Figure S3. Overall survival of patients with RAS mutation**

Abbreviations:Control group, chemotherapy only; Experimental group, chemotherapy plus high-dose vitamin C

**Figure S4. Progression-free survival of patients receiving maintenance therapy or not**

A, Progression-free survival of patients receiving maintenance therapy or not; B, Progression-free survival of patients with RAS mutation receiving maintenance therapy or not.
